# Supplementary material for: Heterointerface engineering of NiFe (oxy)hydroxides/CNTs by in situ anchoring of sub-nano Au for efficient water oxidation
Source: Royal Society of Chemistry journal article supplement (doi:10.1039/d3nr01948a), 2023-01-01
Supplement: d3nr01948a1.pdf [file d3nr01948a1.pdf]

Supporting information

**Heterointerface engineering of NiFe (oxy)hydroxides/CNTs  
by *In situ* anchoring of sub-nano Au for efficient water  
oxidation**

Xiaomei Yu,<sup>a</sup> Zhe Deng,<sup>a</sup> Jiahao Yao,<sup>a</sup> Xinjie Zhang,<sup>a</sup> Lili Zhang,<sup>\*a</sup> Hao Wan,<sup>a</sup> Jian Gao,<sup>a</sup>  
Renzhi Ma,<sup>b</sup> Wei Ma<sup>\*a</sup>

<sup>a</sup>Engineering Research Center of Advanced Functional Material Manufacturing of Ministry of  
Education, School of Chemical Engineering, Zhengzhou University, Zhengzhou 450001, P.R.  
China.

<sup>b</sup>International Centre for Materials Nanoarchitectonics (WPI-MANA), National Institute for  
Materials Science (NIMS), 1-1 Namiki, Tsukuba, Ibaraki 305-0044, Japan

\* Corresponding authors

Email address: llzhang@zzu.edu.cn, mawei@zzu.edu.cn

## Additional Figures and Tables

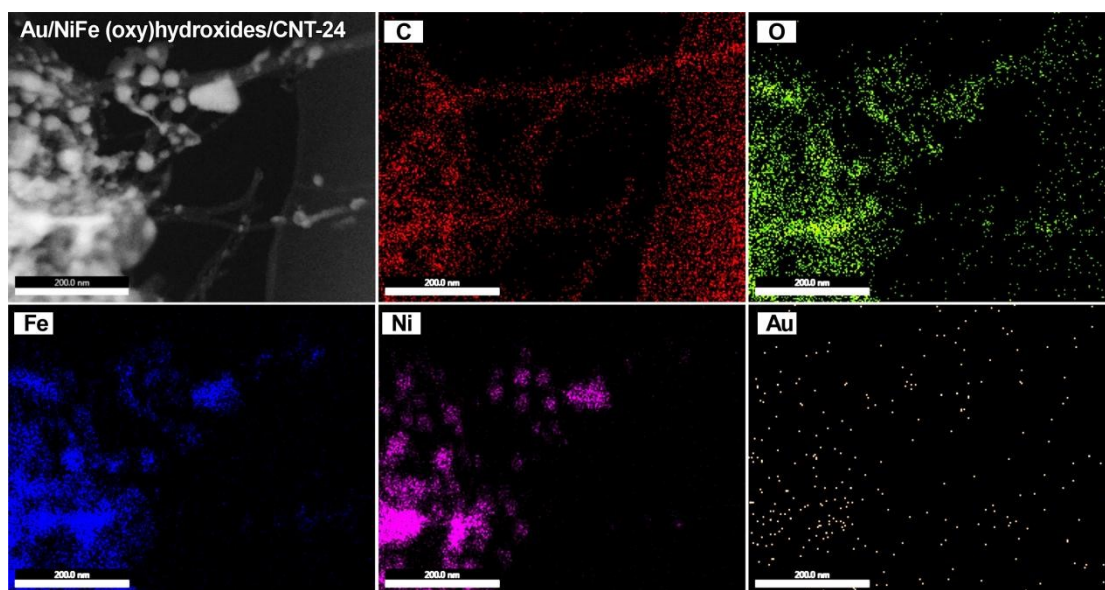

Fig. S1. High-resolution TEM image and EDS elemental mapping of Au/NiFe (oxy)hydroxides/CNTs-24.

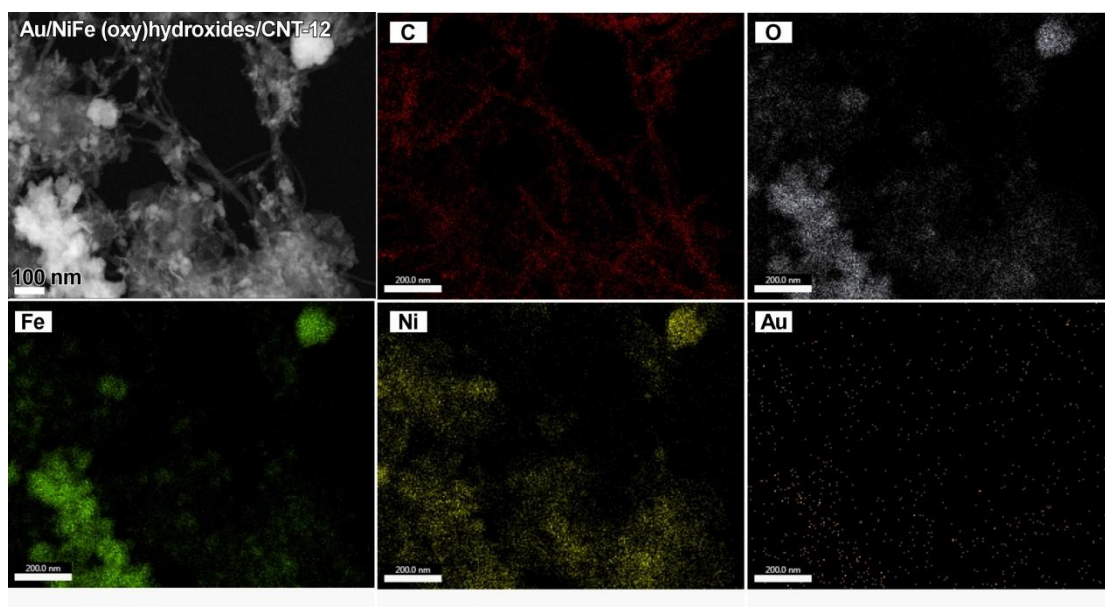

Fig. S2. High-resolution TEM image and EDS elemental mapping of Au/NiFe (oxy)hydroxides/CNTs-12.

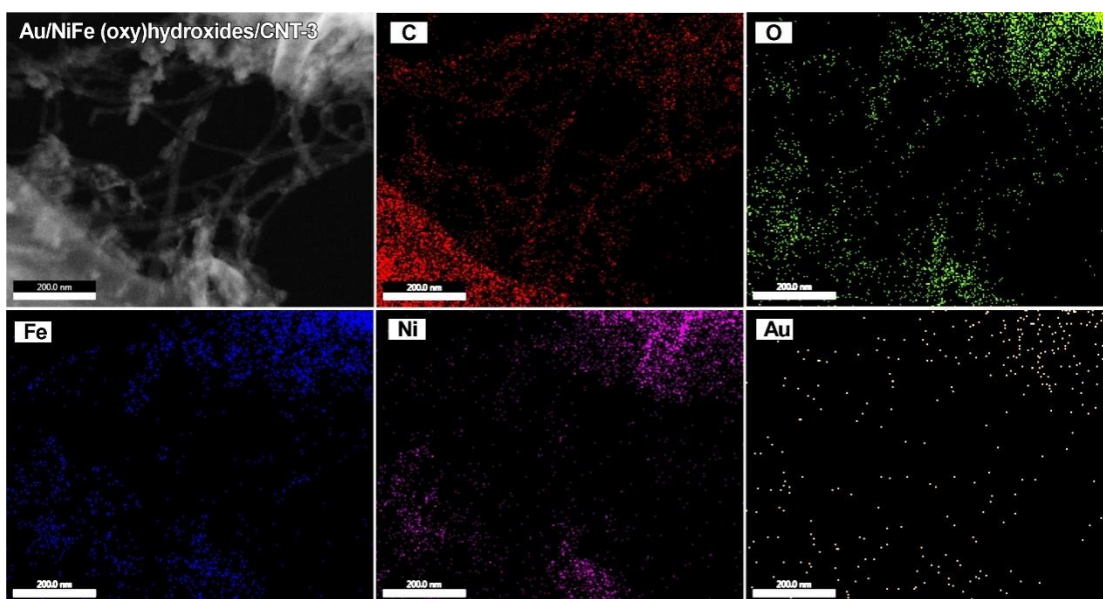

Fig. S3. High-resolution TEM image and EDS elemental mapping of Au/NiFe (oxy)hydroxides/CNTs-3.

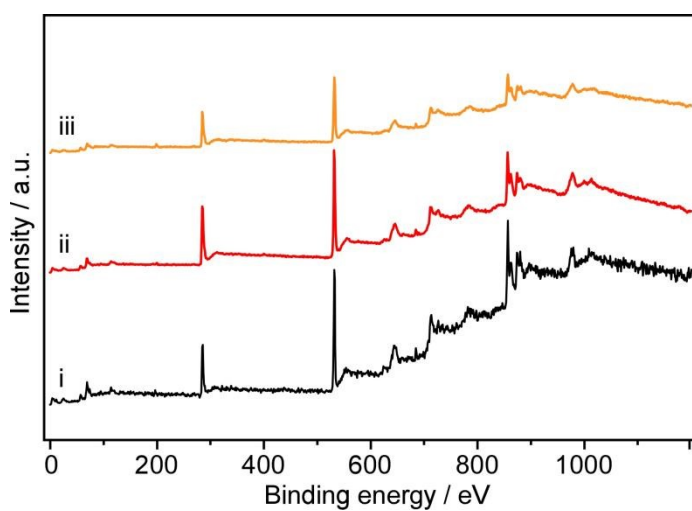

Fig. S4. XPS full spectra of (i) as-synthesized  $\text{Ni}_{1/2}\text{Fe}_{1/2}(\text{OH})_2/\text{CNTs}$ , (ii) Au/NiFe (oxy)hydroxides/CNTs-24 and (iii) Au/NiFe (oxy)hydroxides/CNTs-3, respectively.

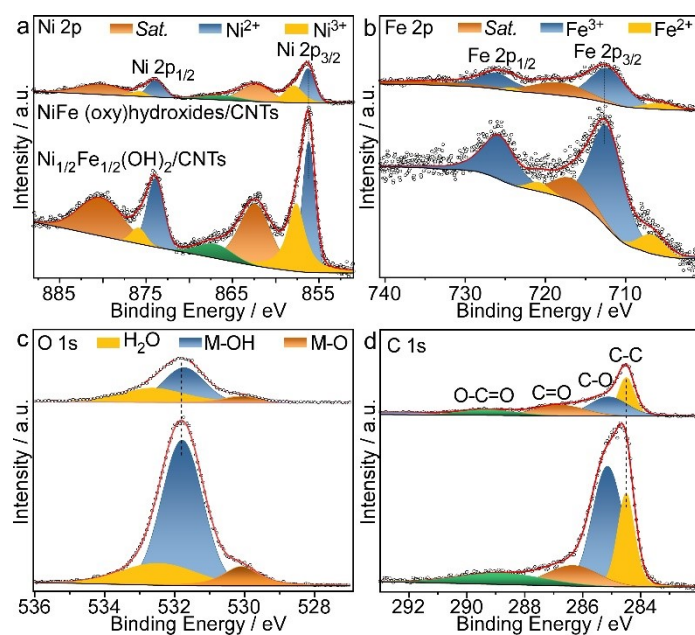

Fig. S5. (a) Ni 2p XPS spectra, (b) Fe 2p XPS spectra, (c) O1s XPS spectra and (d) C1s XPS spectra of the as-synthesized  $\text{Ni}_{1/2}\text{Fe}_{1/2}(\text{OH})_2/\text{CNTs}$  (bottom) and NiFe (oxy)hydroxides/CNTs (top), respectively.

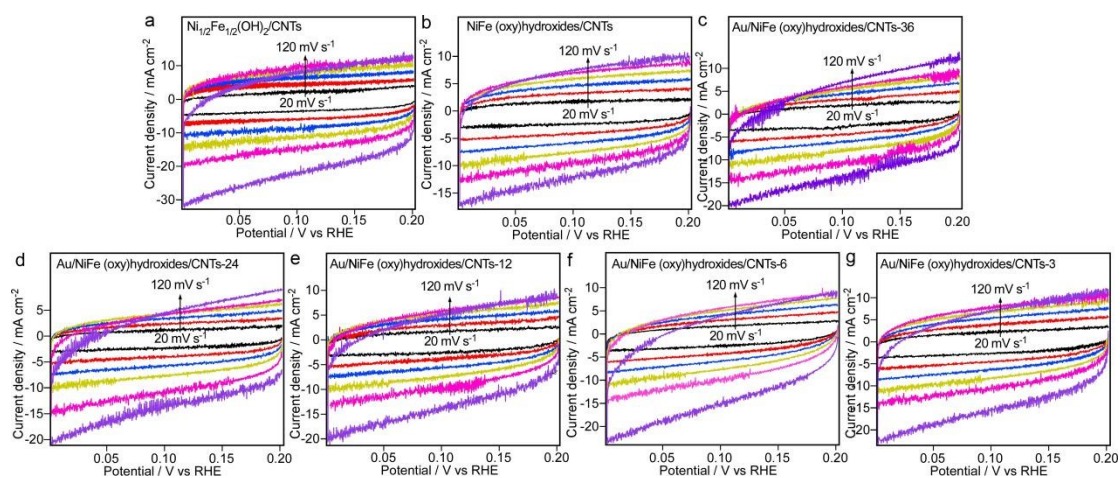

Fig. S6. Cyclic voltammograms of (a) as-synthesized  $\text{Ni}_{1/2}\text{Fe}_{1/2}(\text{OH})_2/\text{CNTs}$ , (b) NiFe (oxy)hydroxides/CNTs, (c) Au/NiFe (oxy)hydroxides/CNTs-36, (d) Au/NiFe (oxy)hydroxides/CNTs-24, (e) Au/NiFe (oxy)hydroxides/CNTs-12, (f) Au/NiFe (oxy)hydroxides/CNTs-6 and (g) Au/NiFe (oxy)hydroxides/CNTs-3 at different scan rate of 20, 40, 60, 80, 100, 120  $\text{mV s}^{-1}$ , respectively.

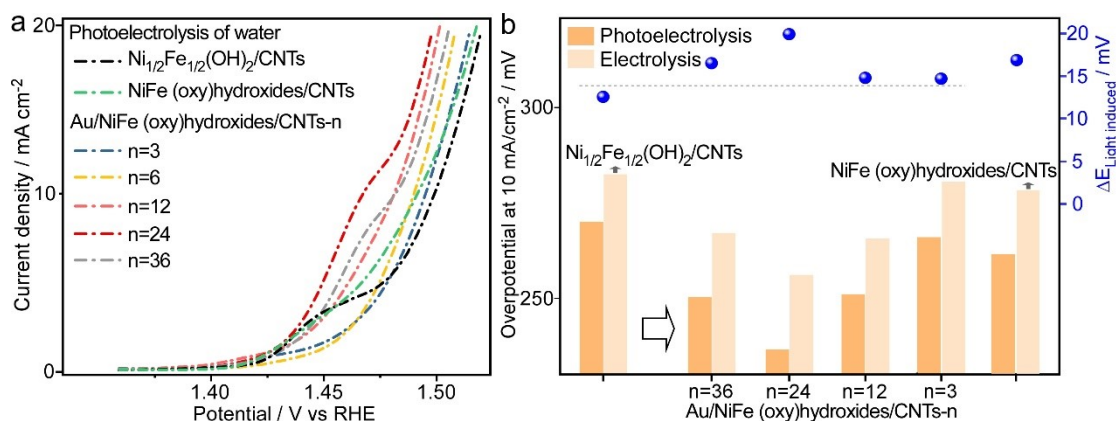

Fig. S7. (a) Photoelectrochemical OER LSV curves of the as-synthesized  $\text{Ni}_{1/2}\text{Fe}_{1/2}(\text{OH})_2/\text{CNTs}$ ,  $\text{NiFe (oxy)hydroxides}/\text{CNTs}$ , and  $\text{Au/NiFe (oxy)hydroxides}/\text{CNTs-n}$ , respectively. (b) (left axis) Comparison of the OER overpotentials obtained from the photoelectrolysis and electrolysis of water of the as-synthesized  $\text{Ni}_{1/2}\text{Fe}_{1/2}(\text{OH})_2/\text{CNTs}$ ,  $\text{NiFe (oxy)hydroxides}/\text{CNTs}$ , and  $\text{Au/NiFe (oxy)hydroxides}/\text{CNTs-n}$ , respectively, and (right axis) the corresponding photo-induced lower of the overpotentials.

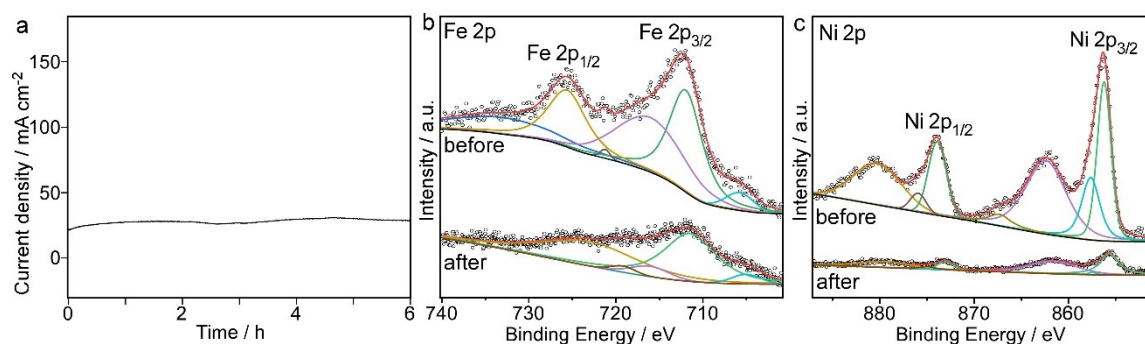

Fig. S8. (a)  $J-t$  curve  $\text{Au/NiFe (oxy)hydroxides}/\text{CNTs-24}$  photoanode measured in 1.0 M KOH under illumination of the simulated solar light. (b) Fe 2p and (c) Ni 2p XPS spectra of  $\text{Au/NiFe (oxy)hydroxide}/\text{CNTs-24}$  before and after 1000 cycles of CV scans under the simulated solar light irradiation.

Table S1. The ratio of  $\text{Ni}^{3+}/\text{Ni}^{2+}$ , and  $\text{Fe}^{3+}/\text{Fe}^{2+}$  in the surface of catalysts.

| Catalysts                                                   | $\text{Ni}^{3+}/\text{Ni}^{2+}$ | $\text{Fe}^{3+}/\text{Fe}^{2+}$ |
|-------------------------------------------------------------|---------------------------------|---------------------------------|
| $\text{Ni}_{1/2}\text{Fe}_{1/2}(\text{OH})_2/\text{CNTs}$   | 0.71                            | 5.68                            |
| $\text{Au/NiFe (oxy)hydroxides}/\text{CNTs-24}$             | 1.17                            | 12.19                           |
| $\text{Au/NiFe (oxy)hydroxides}/\text{CNTs-3}$              | 0.36                            | 8.08                            |
| $\text{O-Ni}_{1/2}\text{Fe}_{1/2}(\text{OH})_2/\text{CNTs}$ | 0.62                            | 10.75                           |

Table S2. Comparison of  $\eta_{10}$  of Au/NiFe(oxy)hydroxides/CNTs-24 with other NiFe (oxy)hydroxides-based electrocatalysts reported previously for water splitting.

| <b>Catalyst</b>                | <b>Electrolyte</b> | <b><math>\eta_{10}</math> (mV)</b> | <b>Ref.s</b>                                      |
|--------------------------------|--------------------|------------------------------------|---------------------------------------------------|
| Au/NiFe(oxy)hydroxides/CNTs-24 | 1.0 M KOH          | 256.1                              | This work                                         |
| NiFe-27%                       | 1.0 M KOH          | 306                                | <i>Nat Commun</i> <b>13</b> , 2191 (2022)         |
| MoNiFe-27% (oxy)hydroxide      | 1.0 M KOH          | 242                                | <i>Nat Commun</i> <b>13</b> , 2191 (2022)         |
| NiCoFe-B <sub>i</sub>          | 1.0 M KOH          | 300                                | <i>Nat Commun</i> <b>12</b> , 5980 (2021)         |
| NiFe LDH                       | 1.0 M KOH          | 348                                | <i>Nat Commun</i> <b>11</b> , 2522 (2020)         |
| CoFe LDH                       | 1.0 M KOH          | 404                                | <i>Nat Commun</i> <b>11</b> , 2522 (2020)         |
| NiFe-oxyhydroxide/C            | 1.0 M KOH          | 269.6                              | <i>J. Mater. Chem. A</i> <b>10</b> , 10342 (2022) |
